# Supplementary material for: Fourier-transform microwave spectroscopy of the s-trans-3-propenalyl (CH2CHĊO) and 3-propenolyl (ĊH2CHCO) radicals
Source: Royal Society of Chemistry journal article supplement (doi:10.1039/d3cp05210a), 2023-01-01
Supplement: d3cp05210a1.pdf [file d3cp05210a1.pdf]

## Supplementary Material

Fourier-transform microwave spectroscopy of the *s-trans*-3-propenyl  
(CH<sub>2</sub>CHĊO) and 3-propenyl (ĊH<sub>2</sub>CHCO) radicals

Yi-Ting Liu, Ching-Hua Chang, Masakazu Nakajima, and Yasuki Endo

Table S1. Cartesian coordinates of the optimized geometries for the three conformers of CH<sub>2</sub>CHCO calculated at all-electron RCCSD(T)/cc-pCVTZ-F12

*s-trans*-CH<sub>2</sub>CHCO

|                                             |              |               |               |
|---------------------------------------------|--------------|---------------|---------------|
| RCCSD(T)-F12A/CVTZ-F12 ENERGY=-191.26137821 |              |               |               |
| H                                           | 0.0000000000 | 1.2699402903  | -1.8672918098 |
| C                                           | 0.0000000000 | 0.1900179059  | -1.8220659514 |
| C                                           | 0.0000000000 | -0.4334266678 | -0.6430666190 |
| H                                           | 0.0000000000 | -0.3613092394 | -2.7506471676 |
| H                                           | 0.0000000000 | -1.5140826328 | -0.5494597205 |
| C                                           | 0.0000000000 | 0.3525248559  | 0.6058384686  |
| O                                           | 0.0000000000 | -0.0437141495 | 1.7205075124  |

linear-CH<sub>2</sub>CHCO

|                                             |              |               |               |
|---------------------------------------------|--------------|---------------|---------------|
| RCCSD(T)-F12A/CVTZ-F12 ENERGY=-191.25888704 |              |               |               |
| H                                           | 0.0000000000 | 1.4411301938  | -1.6361344174 |
| C                                           | 0.0000000000 | 0.3730079633  | -1.7754838095 |
| C                                           | 0.0000000000 | -0.5105625085 | -0.6770522321 |
| H                                           | 0.0000000000 | -0.0274304612 | -2.7738699200 |
| H                                           | 0.0000000000 | -1.5833150843 | -0.8133788105 |
| C                                           | 0.0000000000 | -0.1252078932 | 0.6029171572  |
| O                                           | 0.0000000000 | 0.2078218541  | 1.7167763204  |

*s-cis*-CH<sub>2</sub>CHCO

|                                             |               |               |               |
|---------------------------------------------|---------------|---------------|---------------|
| RCCSD(T)-F12A/CVTZ-F12 ENERGY=-191.25825683 |               |               |               |
| H                                           | -1.4808425741 | -0.2078664268 | -1.0651462608 |
| C                                           | -0.5117454375 | -0.0283473557 | -1.5093851145 |
| C                                           | 0.5782904389  | 0.0823215632  | -0.7445133394 |
| H                                           | -0.4487420464 | 0.0452994285  | -2.5854060496 |
| H                                           | 1.5657474434  | 0.2232571680  | -1.1565584155 |
| C                                           | 0.4899374342  | -0.1570630706 | 0.7110401761  |
| O                                           | -0.3945695865 | 0.0735172181  | 1.4604036973  |

Table S2 Observed transition frequencies of *s-trans*-CH<sub>2</sub>CHCO (in MHz)

| $N'$ | $K_a$ | $K_c$ | $J$ | $F_1'$ | $F_2'$ | $F'$ | $N''$ | $K_a$     | $K_c$  | $J''$ | $F_1$ | $F_2''$ | $F''$ | Obs.                   | Obs-Calc | Int.  |
|------|-------|-------|-----|--------|--------|------|-------|-----------|--------|-------|-------|---------|-------|------------------------|----------|-------|
| 1    | 0     | 1     | 0.5 | 0      | 0.5    | 1    | 0     | 0         | 0      | 0.5   | 1     | 0.5     | 0     | 8986.954               | 0.002    | 0.218 |
|      |       |       | 0.5 | 1      | 0.5    | 1    |       |           |        | 0.5   | 1     | 1.5     | 2     | 8979.731               | 0.001    | 0.580 |
|      |       |       | 0.5 | 1      | 1.5    | 1    |       |           |        | 0.5   | 1     | 1.5     | 1     | 8982.566               | 0.002    | 0.607 |
|      |       |       | 0.5 | 1      | 1.5    | 2    |       |           |        | 0.5   | 1     | 1.5     | 2     | 8984.005               | -0.002   | 1.347 |
|      |       |       | 1.5 | 1      | 0.5    | 0    |       |           |        | 0.5   | 0     | 0.5     | 1     | 8976.784               | -0.002   | 0.331 |
|      |       |       | 1.5 | 1      | 0.5    | 1    |       |           |        | 0.5   | 0     | 0.5     | 1     | 8976.588               | 0.001    | 0.915 |
|      |       |       | 1.5 | 1      | 1.5    | 1    |       |           |        | 0.5   | 0     | 0.5     | 0     | 8976.433               | -0.000   | 0.912 |
|      |       |       | 1.5 | 1      | 1.5    | 2    |       |           |        | 0.5   | 0     | 0.5     | 1     | 8976.238               | -0.001   | 1.639 |
|      |       |       | 1.5 | 2      | 1.5    | 2    |       |           |        | 0.5   | 1     | 0.5     | 1     | 8973.024               | 0.000    | 1.091 |
|      |       |       | 1.5 | 2      | 1.5    | 2    |       |           |        | 0.5   | 1     | 1.5     | 1     | 8972.384               | 0.001    | 0.575 |
|      |       |       | 1.5 | 2      | 2.5    | 2    |       |           |        | 0.5   | 1     | 0.5     | 1     | 8973.245               | 0.001    | 0.460 |
|      |       |       | 1.5 | 2      | 2.5    | 2    |       |           |        | 0.5   | 1     | 1.5     | 1     | 8972.604               | 0.001    | 0.910 |
|      |       |       | 1.5 | 2      | 2.5    | 2    |       |           |        | 0.5   | 1     | 1.5     | 2     | 8972.922               | -0.001   | 0.297 |
|      |       |       | 1.5 | 2      | 2.5    | 3    |       |           |        | 0.5   | 1     | 1.5     | 2     | 8972.181               | 0.000    | 2.333 |
| 2    | 0     | 2     | 1.5 | 1      | 0.5    | 1    | 1     | 0         | 1      | 0.5   | 0     | 0.5     | 1     | 17955.019              | 0.001    | 0.406 |
|      |       |       | 1.5 | 1      | 0.5    | 1    |       |           |        | 0.5   | 1     | 0.5     | 0     | 17962.848              | 0.001    | 0.177 |
|      |       |       | 1.5 | 1      | 0.5    | 1    |       |           |        | 0.5   | 1     | 0.5     | 1     | 17962.241              | 0.001    | 0.324 |
|      |       |       | 1.5 | 1      | 0.5    | 1    |       |           |        | 0.5   | 1     | 1.5     | 2     | 17957.965              | 0.001    | 0.182 |
|      |       |       | 1.5 | 1      | 1.5    | 1    |       |           |        | 0.5   | 0     | 0.5     | 0     | 17957.489              | 0.001    | 0.583 |
|      |       |       | 1.5 | 1      | 1.5    | 1    |       |           |        | 0.5   | 0     | 0.5     | 1     | 17956.968              | 0.003    | 0.073 |
|      |       |       | 1.5 | 1      | 1.5    | 1    |       |           |        | 0.5   | 1     | 1.5     | 1     | 17961.031 <sup>a</sup> | -0.003   | 0.453 |
|      |       |       | 1.5 | 1      | 1.5    | 2    |       |           |        | 0.5   | 0     | 0.5     | 1     | 17958.082              | -0.001   | 1.308 |
|      |       |       | 1.5 | 1      | 1.5    | 2    |       |           |        | 0.5   | 1     | 1.5     | 2     | 17961.031 <sup>a</sup> | 0.002    | 0.569 |
|      |       |       | 1.5 | 2      | 1.5    | 1    |       |           |        | 0.5   | 1     | 0.5     | 0     | 17955.550              | -0.002   | 0.479 |
|      |       |       | 1.5 | 2      | 1.5    | 1    |       |           |        | 0.5   | 1     | 0.5     | 1     | 17954.948              | 0.002    | 0.331 |
|      |       |       | 1.5 | 2      | 1.5    | 2    |       |           |        | 0.5   | 1     | 0.5     | 1     | 17955.801              | 0.000    | 1.072 |
|      |       |       | 1.5 | 2      | 1.5    | 2    |       |           |        | 0.5   | 1     | 1.5     | 1     | 17952.646              | -0.001   | 0.077 |
|      |       |       | 1.5 | 2      | 2.5    | 2    |       |           |        | 0.5   | 1     | 1.5     | 1     | 17954.242              | -0.000   | 1.322 |
|      |       |       | 1.5 | 2      | 2.5    | 2    |       |           |        | 0.5   | 1     | 1.5     | 2     | 17953.120              | 0.000    | 0.127 |
|      |       |       | 1.5 | 2      | 2.5    | 3    |       |           |        | 0.5   | 1     | 1.5     | 2     | 17954.015              | -0.001   | 2.035 |
|      |       |       | 1.5 | 2      | 1.5    | 1    |       |           |        | 1.5   | 2     | 1.5     | 1     | 17961.230              | 0.000    | 0.164 |
|      |       |       | 1.5 | 2      | 1.5    | 1    |       |           |        | 1.5   | 2     | 2.5     | 2     | 17961.753              | 0.001    | 0.065 |
|      |       |       | 1.5 | 2      | 1.5    | 2    |       |           |        | 1.5   | 2     | 1.5     | 1     | 17962.084              | -0.000   | 0.054 |
|      |       |       | 1.5 | 2      | 1.5    | 2    |       |           |        | 1.5   | 2     | 1.5     | 2     | 17962.824              | -0.004   | 0.174 |
|      |       |       | 1.5 | 2      | 1.5    | 2    |       |           |        | 1.5   | 2     | 2.5     | 2     | 17962.609              | 0.002    | 0.151 |
|      |       |       | 1.5 | 2      | 1.5    | 2    |       |           |        | 1.5   | 2     | 2.5     | 3     | 17963.349              | -0.001   | 0.055 |
|      |       |       | 1.5 | 2      | 2.5    | 2    |       |           |        | 1.5   | 2     | 1.5     | 2     | 17964.424              | 0.000    | 0.293 |
|      |       |       | 1.5 | 2      | 2.5    | 2    |       |           |        | 1.5   | 2     | 2.5     | 2     | 17964.205              | 0.002    | 0.165 |
|      |       |       | 1.5 | 2      | 2.5    | 3    |       |           |        | 1.5   | 2     | 2.5     | 2     | 17965.098              | -0.001   | 0.090 |
|      |       |       | 1.5 | 2      | 2.5    | 3    |       |           |        | 1.5   | 2     | 2.5     | 3     | 17965.840              | -0.001   | 0.646 |
| 2.5  | 2     | 1.5   | 1   | 1.5    | 1      | 0.5  | 0     | 17951.658 | 0.003  | 0.660 |       |         |       |                        |          |       |
| 2.5  | 2     | 1.5   | 1   | 1.5    | 1      | 0.5  | 1     | 17951.851 | -0.004 | 0.457 |       |         |       |                        |          |       |
| 2.5  | 2     | 1.5   | 2   | 1.5    | 1      | 0.5  | 1     | 17951.539 | 0.000  | 1.499 |       |         |       |                        |          |       |
| 2.5  | 2     | 1.5   | 2   | 1.5    | 1      | 1.5  | 2     | 17951.887 | 0.001  | 0.405 |       |         |       |                        |          |       |
| 2.5  | 2     | 2.5   | 2   | 1.5    | 1      | 1.5  | 1     | 17951.421 | -0.000 | 1.866 |       |         |       |                        |          |       |
| 2.5  | 2     | 2.5   | 3   | 1.5    | 1      | 1.5  | 2     | 17951.265 | -0.001 | 2.762 |       |         |       |                        |          |       |

|   |   |   |     |   |     |   |   |   |   |     |   |     |   |           |        |       |
|---|---|---|-----|---|-----|---|---|---|---|-----|---|-----|---|-----------|--------|-------|
|   |   |   | 2.5 | 3 | 2.5 | 2 |   |   |   | 1.5 | 2 | 1.5 | 1 | 17948.635 | -0.002 | 1.714 |
|   |   |   | 2.5 | 3 | 2.5 | 2 |   |   |   | 1.5 | 2 | 2.5 | 2 | 17949.162 | 0.002  | 0.262 |
|   |   |   | 2.5 | 3 | 2.5 | 3 |   |   |   | 1.5 | 2 | 2.5 | 2 | 17948.425 | -0.001 | 1.939 |
|   |   |   | 2.5 | 3 | 3.5 | 3 |   |   |   | 1.5 | 2 | 1.5 | 2 | 17948.354 | 0.001  | 2.157 |
|   |   |   | 2.5 | 3 | 3.5 | 4 |   |   |   | 1.5 | 2 | 2.5 | 3 | 17948.143 | 0.001  | 3.600 |
| 2 | 1 | 2 | 1.5 | 1 | 0.5 | 0 | 1 | 1 | 1 | 0.5 | 0 | 0.5 | 1 | 17867.113 | 0.006  | 0.192 |
|   |   |   | 1.5 | 1 | 0.5 | 1 |   |   |   | 0.5 | 0 | 0.5 | 1 | 17867.925 | -0.001 | 0.509 |
|   |   |   | 1.5 | 1 | 0.5 | 1 |   |   |   | 0.5 | 1 | 1.5 | 2 | 17880.742 | 0.001  | 0.093 |
|   |   |   | 1.5 | 1 | 1.5 | 1 |   |   |   | 0.5 | 0 | 0.5 | 0 | 17868.998 | -0.002 | 0.464 |
|   |   |   | 1.5 | 1 | 1.5 | 1 |   |   |   | 0.5 | 1 | 1.5 | 1 | 17881.492 | 0.003  | 0.187 |
|   |   |   | 1.5 | 1 | 1.5 | 2 |   |   |   | 0.5 | 0 | 0.5 | 1 | 17869.774 | -0.002 | 0.786 |
|   |   |   | 1.5 | 1 | 1.5 | 2 |   |   |   | 0.5 | 1 | 0.5 | 1 | 17880.836 | -0.000 | 0.154 |
|   |   |   | 1.5 | 1 | 1.5 | 2 |   |   |   | 0.5 | 1 | 1.5 | 2 | 17882.592 | 0.002  | 0.287 |
|   |   |   | 1.5 | 2 | 1.5 | 1 |   |   |   | 0.5 | 1 | 0.5 | 0 | 17859.306 | 0.002  | 0.419 |
|   |   |   | 1.5 | 2 | 1.5 | 1 |   |   |   | 0.5 | 1 | 0.5 | 1 | 17859.631 | 0.001  | 0.230 |
|   |   |   | 1.5 | 2 | 1.5 | 2 |   |   |   | 0.5 | 1 | 0.5 | 1 | 17860.550 | -0.003 | 0.965 |
|   |   |   | 1.5 | 2 | 1.5 | 2 |   |   |   | 0.5 | 1 | 1.5 | 2 | 17862.304 | -0.003 | 0.296 |
|   |   |   | 1.5 | 2 | 2.5 | 2 |   |   |   | 0.5 | 1 | 1.5 | 1 | 17862.760 | -0.001 | 1.183 |
|   |   |   | 1.5 | 2 | 2.5 | 3 |   |   |   | 0.5 | 1 | 1.5 | 2 | 17863.967 | 0.001  | 1.810 |
|   |   |   | 1.5 | 1 | 1.5 | 2 |   |   |   | 1.5 | 1 | 1.5 | 2 | 17241.987 | -0.002 | 0.141 |
|   |   |   | 1.5 | 2 | 2.5 | 3 |   |   |   | 1.5 | 2 | 2.5 | 3 | 17192.411 | 0.005  | 0.191 |
|   |   |   | 2.5 | 2 | 1.5 | 1 |   |   |   | 1.5 | 1 | 0.5 | 0 | 17547.250 | -0.001 | 0.444 |
|   |   |   | 2.5 | 2 | 1.5 | 1 |   |   |   | 1.5 | 1 | 0.5 | 1 | 17547.482 | 0.013  | 0.190 |
|   |   |   | 2.5 | 2 | 1.5 | 2 |   |   |   | 1.5 | 1 | 0.5 | 1 | 17546.763 | -0.003 | 0.913 |
|   |   |   | 2.5 | 2 | 1.5 | 2 |   |   |   | 1.5 | 1 | 1.5 | 1 | 17545.988 | 0.003  | 0.385 |
|   |   |   | 2.5 | 2 | 1.5 | 2 |   |   |   | 1.5 | 2 | 1.5 | 2 | 17515.833 | 0.003  | 0.122 |
|   |   |   | 2.5 | 2 | 2.5 | 2 |   |   |   | 1.5 | 1 | 0.5 | 1 | 17547.044 | -0.003 | 0.228 |
|   |   |   | 2.5 | 2 | 2.5 | 2 |   |   |   | 1.5 | 1 | 1.5 | 1 | 17546.265 | -0.001 | 0.803 |
|   |   |   | 2.5 | 2 | 2.5 | 2 |   |   |   | 1.5 | 1 | 1.5 | 2 | 17546.478 | -0.006 | 0.300 |
|   |   |   | 2.5 | 2 | 2.5 | 2 |   |   |   | 1.5 | 2 | 2.5 | 2 | 17515.311 | 0.001  | 0.103 |
|   |   |   | 2.5 | 2 | 2.5 | 3 |   |   |   | 1.5 | 1 | 1.5 | 2 | 17545.777 | -0.004 | 1.862 |
|   |   |   | 2.5 | 2 | 2.5 | 3 |   |   |   | 1.5 | 2 | 2.5 | 3 | 17514.815 | -0.006 | 0.217 |
|   |   |   | 2.5 | 3 | 2.5 | 2 |   |   |   | 1.5 | 2 | 1.5 | 1 | 17542.689 | -0.001 | 1.266 |
|   |   |   | 2.5 | 3 | 2.5 | 2 |   |   |   | 1.5 | 2 | 1.5 | 2 | 17542.910 | 0.005  | 0.129 |
|   |   |   | 2.5 | 3 | 2.5 | 3 |   |   |   | 1.5 | 2 | 1.5 | 2 | 17542.196 | -0.000 | 1.531 |
|   |   |   | 2.5 | 3 | 2.5 | 3 |   |   |   | 1.5 | 2 | 2.5 | 2 | 17541.396 | 0.001  | 0.562 |
|   |   |   | 2.5 | 3 | 3.5 | 3 |   |   |   | 1.5 | 2 | 1.5 | 2 | 17542.406 | -0.002 | 0.452 |
|   |   |   | 2.5 | 3 | 3.5 | 3 |   |   |   | 1.5 | 2 | 2.5 | 2 | 17541.603 | -0.004 | 1.445 |
|   |   |   | 2.5 | 3 | 3.5 | 4 |   |   |   | 1.5 | 2 | 2.5 | 3 | 17541.111 | -0.002 | 2.719 |
| 2 | 1 | 1 | 1.5 | 1 | 0.5 | 0 | 1 | 1 | 0 | 0.5 | 0 | 0.5 | 1 | 18521.768 | -0.005 | 0.188 |
|   |   |   | 1.5 | 1 | 0.5 | 1 |   |   |   | 0.5 | 0 | 0.5 | 1 | 18522.234 | 0.001  | 0.455 |
|   |   |   | 1.5 | 1 | 0.5 | 1 |   |   |   | 0.5 | 1 | 1.5 | 2 | 18545.982 | 0.001  | 0.085 |
|   |   |   | 1.5 | 1 | 1.5 | 1 |   |   |   | 0.5 | 0 | 0.5 | 0 | 18523.209 | 0.001  | 0.423 |
|   |   |   | 1.5 | 1 | 1.5 | 1 |   |   |   | 0.5 | 1 | 1.5 | 1 | 18546.045 | -0.001 | 0.199 |
|   |   |   | 1.5 | 1 | 1.5 | 2 |   |   |   | 0.5 | 0 | 0.5 | 1 | 18523.573 | 0.002  | 0.803 |
|   |   |   | 1.5 | 1 | 1.5 | 2 |   |   |   | 0.5 | 1 | 0.5 | 1 | 18544.956 | 0.003  | 0.140 |
|   |   |   | 1.5 | 1 | 1.5 | 2 |   |   |   | 0.5 | 1 | 1.5 | 2 | 18547.318 | -0.001 | 0.297 |
|   |   |   | 1.5 | 2 | 1.5 | 1 |   |   |   | 0.5 | 1 | 0.5 | 0 | 18517.791 | -0.004 | 0.425 |
|   |   |   | 1.5 | 2 | 1.5 | 1 |   |   |   | 0.5 | 1 | 0.5 | 1 | 18518.705 | 0.001  | 0.263 |
|   |   |   | 1.5 | 2 | 1.5 | 2 |   |   |   | 0.5 | 1 | 0.5 | 1 | 18519.226 | 0.006  | 1.008 |

|   |   |   |     |   |     |   |   |   |     |     |     |     |           |           |       |       |
|---|---|---|-----|---|-----|---|---|---|-----|-----|-----|-----|-----------|-----------|-------|-------|
|   |   |   | 1.5 | 2 | 1.5 | 2 |   |   | 0.5 | 1   | 1.5 | 2   | 18521.590 | 0.004     | 0.250 |       |
|   |   |   | 1.5 | 2 | 2.5 | 2 |   |   | 0.5 | 1   | 1.5 | 1   | 18521.493 | 0.000     | 1.207 |       |
|   |   |   | 1.5 | 2 | 2.5 | 3 |   |   | 0.5 | 1   | 1.5 | 2   | 18522.821 | -0.001    | 1.807 |       |
|   |   |   | 1.5 | 2 | 2.5 | 3 |   |   | 1.5 | 2   | 2.5 | 3   | 17833.548 | 0.001     | 0.196 |       |
|   |   |   | 2.5 | 2 | 1.5 | 1 |   |   | 1.5 | 1   | 0.5 | 0   | 18214.633 | -0.000    | 0.445 |       |
|   |   |   | 2.5 | 2 | 1.5 | 2 |   |   | 1.5 | 1   | 0.5 | 1   | 18214.220 | -0.002    | 0.809 |       |
|   |   |   | 2.5 | 2 | 1.5 | 2 |   |   | 1.5 | 1   | 1.5 | 1   | 18213.466 | 0.001     | 0.498 |       |
|   |   |   | 2.5 | 2 | 1.5 | 2 |   |   | 1.5 | 2   | 1.5 | 2   | 18180.786 | -0.004    | 0.111 |       |
|   |   |   | 2.5 | 2 | 2.5 | 2 |   |   | 1.5 | 1   | 0.5 | 1   | 18214.407 | 0.002     | 0.313 |       |
|   |   |   | 2.5 | 2 | 2.5 | 2 |   |   | 1.5 | 1   | 1.5 | 1   | 18213.653 | 0.005     | 0.717 |       |
|   |   |   | 2.5 | 2 | 2.5 | 2 |   |   | 1.5 | 1   | 1.5 | 2   | 18213.703 | -0.006    | 0.306 |       |
|   |   |   | 2.5 | 2 | 2.5 | 2 |   |   | 1.5 | 2   | 2.5 | 2   | 18180.215 | 0.002     | 0.094 |       |
|   |   |   | 2.5 | 2 | 2.5 | 3 |   |   | 1.5 | 1   | 1.5 | 2   | 18213.234 | -0.003    | 1.868 |       |
|   |   |   | 2.5 | 2 | 2.5 | 3 |   |   | 1.5 | 2   | 2.5 | 3   | 18179.781 | -0.002    | 0.214 |       |
|   |   |   | 2.5 | 3 | 2.5 | 2 |   |   | 1.5 | 2   | 1.5 | 1   | 18210.871 | -0.002    | 1.267 |       |
|   |   |   | 2.5 | 3 | 2.5 | 2 |   |   | 1.5 | 2   | 2.5 | 2   | 18210.149 | -0.005    | 0.098 |       |
|   |   |   | 2.5 | 3 | 2.5 | 3 |   |   | 1.5 | 2   | 1.5 | 2   | 18210.444 | -0.003    | 1.331 |       |
|   |   |   | 2.5 | 3 | 2.5 | 3 |   |   | 1.5 | 2   | 2.5 | 2   | 18209.687 | -0.000    | 0.771 |       |
|   |   |   | 2.5 | 3 | 3.5 | 3 |   |   | 1.5 | 2   | 1.5 | 2   | 18210.577 | 0.001     | 0.644 |       |
|   |   |   | 2.5 | 3 | 3.5 | 3 |   |   | 1.5 | 2   | 2.5 | 2   | 18209.819 | 0.002     | 1.248 |       |
|   |   |   | 2.5 | 3 | 3.5 | 4 |   |   | 1.5 | 2   | 2.5 | 3   | 18209.389 | -0.002    | 2.720 |       |
| 3 | 0 | 3 | 2.5 | 2 | 1.5 | 1 | 2 | 0 | 2   | 1.5 | 1   | 0.5 | 1         | 26929.524 | 0.001 | 0.371 |
|   |   |   | 2.5 | 2 | 1.5 | 2 |   |   | 1.5 | 1   | 0.5 | 1   | 26930.669 | -0.001    | 1.422 |       |
|   |   |   | 2.5 | 2 | 1.5 | 2 |   |   | 1.5 | 2   | 1.5 | 2   | 26937.109 | -0.001    | 0.252 |       |
|   |   |   | 2.5 | 2 | 2.5 | 2 |   |   | 1.5 | 1   | 1.5 | 1   | 26930.132 | -0.002    | 1.683 |       |
|   |   |   | 2.5 | 2 | 2.5 | 2 |   |   | 1.5 | 2   | 2.5 | 2   | 26936.927 | 0.001     | 0.305 |       |
|   |   |   | 2.5 | 2 | 2.5 | 3 |   |   | 1.5 | 1   | 1.5 | 2   | 26930.163 | -0.001    | 2.534 |       |
|   |   |   | 2.5 | 2 | 2.5 | 3 |   |   | 1.5 | 2   | 2.5 | 3   | 26937.174 | -0.003    | 0.395 |       |
|   |   |   | 2.5 | 3 | 2.5 | 2 |   |   | 1.5 | 2   | 1.5 | 1   | 26927.930 | 0.003     | 1.599 |       |
|   |   |   | 2.5 | 3 | 2.5 | 2 |   |   | 1.5 | 2   | 1.5 | 2   | 26927.072 | -0.000    | 0.222 |       |
|   |   |   | 2.5 | 3 | 2.5 | 3 |   |   | 1.5 | 2   | 1.5 | 2   | 26927.907 | -0.001    | 2.455 |       |
|   |   |   | 2.5 | 3 | 2.5 | 3 |   |   | 1.5 | 2   | 2.5 | 3   | 26925.418 | 0.002     | 0.223 |       |
|   |   |   | 2.5 | 3 | 3.5 | 3 |   |   | 1.5 | 2   | 2.5 | 2   | 26927.566 | 0.002     | 2.542 |       |
|   |   |   | 2.5 | 3 | 3.5 | 4 |   |   | 1.5 | 2   | 2.5 | 3   | 26927.532 | -0.001    | 3.401 |       |
|   |   |   | 2.5 | 3 | 3.5 | 3 |   |   | 2.5 | 3   | 3.5 | 3   | 26943.637 | 0.002     | 0.291 |       |
|   |   |   | 2.5 | 3 | 3.5 | 4 |   |   | 2.5 | 3   | 3.5 | 4   | 26945.231 | -0.001    | 0.397 |       |
|   |   |   | 3.5 | 3 | 2.5 | 2 |   |   | 2.5 | 2   | 1.5 | 1   | 26923.688 | 0.004     | 1.783 |       |
|   |   |   | 3.5 | 3 | 2.5 | 2 |   |   | 2.5 | 2   | 1.5 | 2   | 26923.999 | -0.001    | 0.271 |       |
|   |   |   | 3.5 | 3 | 2.5 | 3 |   |   | 2.5 | 2   | 1.5 | 2   | 26923.554 | -0.001    | 2.690 |       |
|   |   |   | 3.5 | 3 | 2.5 | 3 |   |   | 2.5 | 2   | 2.5 | 3   | 26924.177 | 0.001     | 0.247 |       |
|   |   |   | 3.5 | 3 | 3.5 | 3 |   |   | 2.5 | 2   | 2.5 | 2   | 26923.489 | 0.002     | 2.876 |       |
|   |   |   | 3.5 | 3 | 3.5 | 4 |   |   | 2.5 | 2   | 2.5 | 3   | 26923.361 | -0.001    | 3.814 |       |
|   |   |   | 3.5 | 4 | 3.5 | 3 |   |   | 2.5 | 3   | 2.5 | 2   | 26921.130 | -0.001    | 2.775 |       |
|   |   |   | 3.5 | 4 | 3.5 | 4 |   |   | 2.5 | 3   | 2.5 | 3   | 26921.052 | 0.001     | 3.601 |       |
|   |   |   | 3.5 | 4 | 4.5 | 4 |   |   | 2.5 | 3   | 3.5 | 3   | 26920.960 | 0.001     | 3.727 |       |
|   |   |   | 3.5 | 4 | 4.5 | 5 |   |   | 2.5 | 3   | 3.5 | 4   | 26920.880 | 0.002     | 4.714 |       |
| 3 | 1 | 3 | 2.5 | 2 | 1.5 | 1 | 2 | 1 | 2   | 1.5 | 1   | 0.5 | 0         | 26514.390 | 0.000 | 0.536 |
|   |   |   | 2.5 | 2 | 1.5 | 2 |   |   | 1.5 | 1   | 0.5 | 1   | 26514.683 | 0.003     | 1.220 |       |
|   |   |   | 2.5 | 2 | 2.5 | 2 |   |   | 1.5 | 1   | 1.5 | 1   | 26514.659 | -0.002    | 1.516 |       |
|   |   |   | 2.5 | 2 | 2.5 | 3 |   |   | 1.5 | 1   | 1.5 | 2   | 26514.947 | -0.000    | 2.264 |       |

|   |   |   |     |   |     |   |   |   |   |     |   |     |   |                        |        |        |
|---|---|---|-----|---|-----|---|---|---|---|-----|---|-----|---|------------------------|--------|--------|
|   |   |   | 2.5 | 3 | 2.5 | 2 |   |   |   | 1.5 | 2 | 1.5 | 1 | 26511.229              | -0.000 | 1.502  |
|   |   |   | 2.5 | 3 | 2.5 | 3 |   |   |   | 1.5 | 2 | 1.5 | 2 | 26511.418              | 0.001  | 2.240  |
|   |   |   | 2.5 | 3 | 3.5 | 3 |   |   |   | 1.5 | 2 | 2.5 | 2 | 26511.521              | -0.002 | 2.426  |
|   |   |   | 2.5 | 3 | 3.5 | 4 |   |   |   | 1.5 | 2 | 2.5 | 3 | 26511.705              | -0.001 | 3.235  |
|   |   |   | 3.5 | 3 | 2.5 | 2 |   |   |   | 2.5 | 2 | 1.5 | 1 | 26392.803              | 0.001  | 1.502  |
|   |   |   | 3.5 | 3 | 2.5 | 3 |   |   |   | 2.5 | 2 | 2.5 | 2 | 26392.512              | -0.004 | 1.742  |
|   |   |   | 3.5 | 3 | 3.5 | 3 |   |   |   | 2.5 | 2 | 1.5 | 2 | 26392.550              | 0.002  | 1.985  |
|   |   |   | 3.5 | 3 | 3.5 | 4 |   |   |   | 2.5 | 2 | 2.5 | 3 | 26392.264              | 0.002  | 3.222  |
|   |   |   | 3.5 | 4 | 3.5 | 3 |   |   |   | 2.5 | 3 | 2.5 | 2 | 26390.082              | -0.001 | 2.449  |
|   |   |   | 3.5 | 4 | 3.5 | 4 |   |   |   | 2.5 | 3 | 2.5 | 3 | 26390.006              | 0.000  | 1.132  |
|   |   |   | 3.5 | 4 | 3.5 | 4 |   |   |   | 2.5 | 3 | 3.5 | 3 | 26389.794              | 0.000  | 2.103  |
|   |   |   | 3.5 | 4 | 4.5 | 4 |   |   |   | 2.5 | 3 | 2.5 | 3 | 26389.748              | 0.000  | 2.282  |
|   |   |   | 3.5 | 4 | 4.5 | 4 |   |   |   | 2.5 | 3 | 3.5 | 3 | 26389.537              | 0.001  | 1.132  |
|   |   |   | 3.5 | 4 | 4.5 | 5 |   |   |   | 2.5 | 3 | 3.5 | 4 | 26389.458              | -0.000 | 4.199  |
| 3 | 1 | 2 | 2.5 | 2 | 1.5 | 1 | 2 | 1 | 1 | 1.5 | 1 | 0.5 | 0 | 27503.582              | 0.002  | 0.535  |
|   |   |   | 2.5 | 2 | 1.5 | 1 |   |   |   | 1.5 | 1 | 0.5 | 1 | 27503.119              | -0.002 | 0.335  |
|   |   |   | 2.5 | 2 | 1.5 | 2 |   |   |   | 1.5 | 1 | 0.5 | 1 | 27503.845              | 0.001  | 1.266  |
|   |   |   | 2.5 | 2 | 2.5 | 2 |   |   |   | 1.5 | 1 | 1.5 | 1 | 27503.976              | 0.000  | 1.500  |
|   |   |   | 2.5 | 2 | 2.5 | 3 |   |   |   | 1.5 | 1 | 1.5 | 2 | 27504.236              | -0.002 | 2.257  |
|   |   |   | 2.5 | 3 | 2.5 | 2 |   |   |   | 1.5 | 2 | 1.5 | 1 | 27501.757              | -0.001 | 1.504  |
|   |   |   | 2.5 | 3 | 2.5 | 2 |   |   |   | 1.5 | 2 | 1.5 | 2 | 27501.235              | -0.007 | 0.211  |
|   |   |   | 2.5 | 3 | 2.5 | 3 |   |   |   | 1.5 | 2 | 1.5 | 2 | 27501.975              | -0.001 | 2.297  |
|   |   |   | 2.5 | 3 | 2.5 | 3 |   |   |   | 1.5 | 2 | 2.5 | 3 | 27500.744              | 0.004  | 0.198  |
|   |   |   | 2.5 | 3 | 3.5 | 3 |   |   |   | 1.5 | 2 | 2.5 | 2 | 27502.155              | 0.001  | 2.425  |
|   |   |   | 2.5 | 3 | 3.5 | 4 |   |   |   | 1.5 | 2 | 2.5 | 3 | 27502.369              | -0.001 | 3.234  |
|   |   |   | 3.5 | 3 | 2.5 | 2 |   |   |   | 2.5 | 2 | 1.5 | 1 | 27391.786              | 0.001  | 1.508  |
|   |   |   | 3.5 | 3 | 2.5 | 3 |   |   |   | 2.5 | 2 | 1.5 | 2 | 27391.734              | 0.003  | 0.882  |
|   |   |   | 3.5 | 3 | 2.5 | 3 |   |   |   | 2.5 | 2 | 2.5 | 2 | 27391.547              | -0.001 | 1.386  |
|   |   |   | 3.5 | 3 | 3.5 | 3 |   |   |   | 2.5 | 2 | 1.5 | 2 | 27391.492              | 0.002  | 1.607  |
|   |   |   | 3.5 | 3 | 3.5 | 4 |   |   |   | 2.5 | 2 | 2.5 | 3 | 27391.252              | -0.002 | 3.234  |
|   |   |   | 3.5 | 4 | 3.5 | 3 |   |   |   | 2.5 | 3 | 2.5 | 2 | 27389.767              | -0.000 | 2.451  |
|   |   |   | 3.5 | 4 | 3.5 | 4 |   |   |   | 2.5 | 3 | 2.5 | 3 | 27389.680              | 0.002  | 1.456  |
|   |   |   | 3.5 | 4 | 3.5 | 4 |   |   |   | 2.5 | 3 | 3.5 | 3 | 27389.552              | 0.003  | 1.807  |
|   |   |   | 3.5 | 4 | 4.5 | 4 |   |   |   | 2.5 | 3 | 2.5 | 3 | 27389.405              | -0.004 | 1.967  |
|   |   |   | 3.5 | 4 | 4.5 | 4 |   |   |   | 2.5 | 3 | 3.5 | 3 | 27389.277              | -0.003 | 1.423  |
|   |   |   | 3.5 | 4 | 4.5 | 5 |   |   |   | 2.5 | 3 | 3.5 | 4 | 27389.190              | -0.001 | 4.199  |
| 2 | 1 | 1 | 1.5 | 2 | 1.5 | 2 | 2 | 0 | 2 | 1.5 | 2 | 1.5 | 2 | 56159.900 <sup>b</sup> | 0.011  | 0.981  |
|   |   |   | 1.5 | 2 | 2.5 | 2 |   |   |   | 1.5 | 2 | 2.5 | 2 | 56159.018 <sup>b</sup> | 0.008  | 1.172  |
|   |   |   | 1.5 | 2 | 2.5 | 3 |   |   |   | 1.5 | 2 | 2.5 | 3 | 56158.636 <sup>b</sup> | 0.003  | 1.641* |
|   |   |   | 2.5 | 3 | 2.5 | 2 |   |   |   | 2.5 | 3 | 2.5 | 2 | 56551.219 <sup>b</sup> | -0.002 | 1.991* |
|   |   |   | 2.5 | 3 | 3.5 | 3 |   |   |   | 2.5 | 3 | 3.5 | 4 | 56552.651 <sup>b</sup> | 0.008  | 0.238* |
|   |   |   | 2.5 | 3 | 3.5 | 4 |   |   |   | 2.5 | 3 | 3.5 | 4 | 56552.172 <sup>b</sup> | -0.004 | 3.739* |
| 3 | 1 | 2 | 2.5 | 3 | 2.5 | 3 | 3 | 0 | 3 | 2.5 | 3 | 2.5 | 3 | 56733.944 <sup>b</sup> | -0.013 | 1.961* |
|   |   |   | 2.5 | 3 | 3.5 | 4 |   |   |   | 2.5 | 3 | 3.5 | 4 | 56733.468 <sup>b</sup> | -0.002 | 2.712* |
|   |   |   | 3.5 | 4 | 3.5 | 3 |   |   |   | 3.5 | 4 | 3.5 | 3 | 57019.846 <sup>b</sup> | -0.011 | 3.103* |
|   |   |   | 3.5 | 4 | 4.5 | 5 |   |   |   | 3.5 | 4 | 4.5 | 5 | 57020.481 <sup>b</sup> | -0.007 | 4.983* |

<sup>a</sup>Overlapped lines. Weights of 0.25 were given.

<sup>b</sup>Observed by double resonance. Weights of 0.25 were given.

Table S3 Observed transition frequencies of linear-CH<sub>2</sub>CHCO (in MHz)

| $N'$ | $K_a'$ | $K_c'$ | $J'$ | $F_1'$ | $F_2'$ | $F'$ | $N''$ | $K_a''$ | $K_c''$ | $J''$ | $F_1''$ | $F_2''$   | $F''$  | Obs.      | Obs-Calc  | Int.   |       |
|------|--------|--------|------|--------|--------|------|-------|---------|---------|-------|---------|-----------|--------|-----------|-----------|--------|-------|
| 1    | 0      | 1      | 0.5  | 1      | 0.5    | 1    | 0     | 0       | 0       | 0.5   | 1       | 1.5       | 2      | 9079.907  | 0.006     | 0.781  |       |
|      |        |        | 0.5  | 1      | 1.5    | 1    |       |         |         |       | 0.5     | 0         | 0.5    | 0         | 9081.554  | -0.000 | 0.880 |
|      |        |        | 0.5  | 1      | 1.5    | 2    |       |         |         |       | 0.5     | 0         | 0.5    | 1         | 9081.841  | -0.000 | 1.664 |
|      |        |        | 1.5  | 1      | 0.5    | 1    |       |         |         |       | 0.5     | 0         | 0.5    | 1         | 9079.847  | -0.001 | 0.879 |
|      |        |        | 1.5  | 1      | 1.5    | 1    |       |         |         |       | 0.5     | 1         | 1.5    | 1         | 9080.075  | -0.005 | 0.923 |
|      |        |        | 1.5  | 1      | 1.5    | 2    |       |         |         |       | 0.5     | 1         | 1.5    | 2         | 9080.235  | -0.001 | 1.608 |
|      |        |        | 1.5  | 2      | 1.5    | 1    |       |         |         |       | 0.5     | 1         | 0.5    | 0         | 9081.147  | 0.000  | 0.738 |
|      |        |        | 1.5  | 2      | 1.5    | 2    |       |         |         |       | 0.5     | 1         | 0.5    | 1         | 9079.431  | 0.000  | 1.612 |
|      |        |        | 1.5  | 2      | 2.5    | 2    |       |         |         |       | 0.5     | 1         | 1.5    | 1         | 9079.300  | 0.001  | 1.658 |
|      |        |        | 1.5  | 2      | 2.5    | 3    |       |         |         |       | 0.5     | 1         | 1.5    | 2         | 9079.047  | -0.001 | 2.334 |
| 2    | 0      | 2      | 1.5  | 1      | 0.5    | 1    | 1     | 0       | 1       | 0.5   | 1       | 0.5       | 1      | 18167.323 | -0.000    | 0.608  |       |
|      |        |        | 1.5  | 1      | 1.5    | 2    |       |         |         |       | 0.5     | 0         | 0.5    | 1         | 18157.578 | -0.001 | 1.462 |
|      |        |        | 1.5  | 2      | 1.5    | 1    |       |         |         |       | 0.5     | 1         | 0.5    | 0         | 18161.195 | 0.003  | 0.486 |
|      |        |        | 1.5  | 2      | 1.5    | 2    |       |         |         |       | 0.5     | 1         | 0.5    | 1         | 18160.480 | 0.003  | 0.838 |
|      |        |        | 1.5  | 2      | 2.5    | 2    |       |         |         |       | 0.5     | 1         | 1.5    | 1         | 18159.685 | -0.002 | 1.875 |
|      |        |        | 1.5  | 2      | 2.5    | 3    |       |         |         |       | 0.5     | 1         | 1.5    | 2         | 18159.782 | 0.001  | 2.794 |
|      |        |        | 1.5  | 2      | 1.5    | 1    |       |         |         |       | 1.5     | 1         | 1.5    | 1         | 18162.033 | -0.001 | 0.388 |
|      |        |        | 1.5  | 2      | 1.5    | 2    |       |         |         |       | 1.5     | 1         | 1.5    | 2         | 18160.139 | -0.002 | 0.864 |
|      |        |        | 2.5  | 2      | 1.5    | 2    |       |         |         |       | 0.5     | 1         | 1.5    | 2         | 18156.509 | 0.001  | 0.391 |
|      |        |        | 2.5  | 2      | 1.5    | 1    |       |         |         |       | 1.5     | 1         | 0.5    | 0         | 18158.194 | 0.000  | 0.665 |
|      |        |        | 2.5  | 2      | 1.5    | 2    |       |         |         |       | 1.5     | 1         | 0.5    | 1         | 18158.503 | 0.001  | 1.542 |
|      |        |        | 2.5  | 2      | 2.5    | 2    |       |         |         |       | 1.5     | 1         | 1.5    | 1         | 18158.088 | 0.000  | 1.414 |
|      |        |        | 2.5  | 2      | 2.5    | 2    |       |         |         |       | 1.5     | 2         | 2.5    | 2         | 18158.870 | 0.001  | 0.442 |
|      |        |        | 2.5  | 2      | 2.5    | 3    |       |         |         |       | 1.5     | 1         | 1.5    | 2         | 18157.501 | -0.001 | 1.891 |
|      |        |        | 2.5  | 2      | 2.5    | 3    |       |         |         |       | 1.5     | 2         | 2.5    | 3         | 18158.689 | -0.001 | 0.875 |
|      |        |        | 2.5  | 3      | 2.5    | 2    |       |         |         |       | 1.5     | 2         | 1.5    | 1         | 18157.350 | 0.000  | 1.799 |
|      |        |        | 2.5  | 3      | 2.5    | 3    |       |         |         |       | 1.5     | 2         | 1.5    | 2         | 18156.955 | -0.001 | 2.758 |
|      |        |        | 2.5  | 3      | 3.5    | 3    |       |         |         |       | 1.5     | 2         | 2.5    | 2         | 18156.973 | 0.001  | 2.777 |
| 2.5  | 3      | 3.5    | 4    |        |        |      |       | 1.5     | 2       | 2.5   | 3       | 18156.755 | -0.001 | 3.601     |           |        |       |
| 2    | 1      | 2      | 1.5  | 2      | 1.5    | 2    | 1     | 1       | 1       | 0.5   | 1       | 0.5       | 1      | 17814.335 | 0.000     | 0.998  |       |
|      |        |        | 1.5  | 2      | 2.5    | 2    |       |         |         |       | 0.5     | 1         | 1.5    | 1         | 17821.642 | 0.000  | 1.033 |
|      |        |        | 1.5  | 2      | 2.5    | 3    |       |         |         |       | 0.5     | 1         | 1.5    | 2         | 17821.518 | -0.000 | 1.667 |
|      |        |        | 2.5  | 2      | 1.5    | 2    |       |         |         |       | 1.5     | 1         | 0.5    | 1         | 17703.625 | 0.001  | 1.212 |
|      |        |        | 2.5  | 2      | 2.5    | 2    |       |         |         |       | 1.5     | 1         | 1.5    | 1         | 17706.134 | 0.000  | 1.189 |
|      |        |        | 2.5  | 2      | 2.5    | 3    |       |         |         |       | 1.5     | 1         | 1.5    | 2         | 17705.596 | 0.000  | 1.882 |
|      |        |        | 2.5  | 3      | 2.5    | 2    |       |         |         |       | 1.5     | 2         | 1.5    | 1         | 17708.343 | 0.000  | 1.331 |
|      |        |        | 2.5  | 3      | 2.5    | 3    |       |         |         |       | 1.5     | 2         | 1.5    | 2         | 17707.579 | 0.001  | 2.080 |
|      |        |        | 2.5  | 3      | 3.5    | 3    |       |         |         |       | 1.5     | 2         | 2.5    | 2         | 17708.556 | -0.002 | 1.986 |
|      |        |        | 2.5  | 3      | 3.5    | 4    |       |         |         |       | 1.5     | 2         | 2.5    | 3         | 17707.972 | -0.001 | 2.708 |
| 2    | 1      | 1      | 1.5  | 1      | 1.5    | 2    | 1     | 1       | 0       | 0.5   | 1       | 0.5       | 1      | 18680.138 | 0.000     | 0.714  |       |
|      |        |        | 1.5  | 2      | 2.5    | 2    |       |         |         |       | 0.5     | 1         | 1.5    | 1         | 18675.122 | 0.000  | 0.609 |
|      |        |        | 1.5  | 2      | 2.5    | 3    |       |         |         |       | 0.5     | 1         | 1.5    | 2         | 18675.518 | 0.000  | 1.652 |
|      |        |        | 2.5  | 2      | 1.5    | 2    |       |         |         |       | 1.5     | 1         | 0.5    | 1         | 18554.571 | -0.000 | 1.218 |
|      |        |        | 2.5  | 2      | 2.5    | 2    |       |         |         |       | 1.5     | 2         | 1.5    | 1         | 18558.270 | -0.001 | 1.327 |
|      |        |        | 2.5  | 2      | 2.5    | 3    |       |         |         |       | 1.5     | 2         | 1.5    | 2         | 18557.683 | 0.001  | 2.069 |
|      |        |        | 2.5  | 3      | 2.5    | 2    |       |         |         |       | 1.5     | 1         | 1.5    | 1         | 18557.746 | -0.000 | 1.189 |
|      |        |        | 2.5  | 3      | 2.5    | 3    |       |         |         |       | 1.5     | 1         | 1.5    | 2         | 18557.406 | 0.000  | 1.881 |

---

|   |   |   |     |   |     |   |   |   |   |     |   |     |   |           |        |       |
|---|---|---|-----|---|-----|---|---|---|---|-----|---|-----|---|-----------|--------|-------|
|   |   |   | 2.5 | 3 | 3.5 | 3 |   |   |   | 1.5 | 2 | 2.5 | 2 | 18558.774 | -0.001 | 1.988 |
|   |   |   | 2.5 | 3 | 3.5 | 4 |   |   |   | 1.5 | 2 | 2.5 | 3 | 18558.490 | -0.000 | 2.707 |
| 3 | 0 | 3 | 2.5 | 2 | 2.5 | 2 | 2 | 0 | 2 | 1.5 | 1 | 1.5 | 1 | 27231.978 | 0.002  | 1.765 |
|   |   |   | 2.5 | 2 | 2.5 | 3 |   |   |   | 1.5 | 1 | 1.5 | 2 | 27231.592 | 0.000  | 2.694 |
|   |   |   | 2.5 | 3 | 2.5 | 2 |   |   |   | 1.5 | 2 | 1.5 | 1 | 27231.356 | 0.001  | 1.581 |
|   |   |   | 2.5 | 3 | 2.5 | 3 |   |   |   | 1.5 | 2 | 1.5 | 2 | 27230.968 | -0.002 | 2.189 |
|   |   |   | 2.5 | 3 | 3.5 | 3 |   |   |   | 1.5 | 2 | 2.5 | 2 | 27231.425 | -0.003 | 2.894 |
|   |   |   | 2.5 | 3 | 3.5 | 4 |   |   |   | 1.5 | 2 | 2.5 | 3 | 27231.440 | 0.001  | 3.849 |
|   |   |   | 3.5 | 3 | 2.5 | 3 |   |   |   | 2.5 | 2 | 1.5 | 2 | 27230.172 | -0.002 | 2.725 |
|   |   |   | 3.5 | 3 | 3.5 | 3 |   |   |   | 2.5 | 2 | 2.5 | 2 | 27229.471 | 0.002  | 2.565 |
|   |   |   | 3.5 | 3 | 3.5 | 4 |   |   |   | 2.5 | 2 | 2.5 | 3 | 27229.118 | 0.001  | 3.244 |
|   |   |   | 3.5 | 4 | 3.5 | 3 |   |   |   | 2.5 | 3 | 2.5 | 2 | 27228.734 | 0.001  | 2.841 |
|   |   |   | 3.5 | 4 | 3.5 | 4 |   |   |   | 2.5 | 3 | 2.5 | 3 | 27228.463 | -0.001 | 3.823 |
|   |   |   | 3.5 | 4 | 4.5 | 4 |   |   |   | 2.5 | 3 | 3.5 | 3 | 27228.500 | 0.000  | 3.827 |
|   |   |   | 3.5 | 4 | 4.5 | 5 |   |   |   | 2.5 | 3 | 3.5 | 4 | 27228.330 | -0.000 | 4.716 |
| 2 | 1 | 2 | 1.5 | 2 | 1.5 | 2 | 3 | 0 | 3 | 2.5 | 2 | 2.5 | 3 | 16346.006 | 0.000  | 0.819 |
|   |   |   | 2.5 | 2 | 2.5 | 2 |   |   |   | 2.5 | 3 | 3.5 | 3 | 16453.591 | 0.000  | 0.579 |
|   |   |   | 2.5 | 2 | 2.5 | 3 |   |   |   | 2.5 | 3 | 3.5 | 4 | 16456.129 | -0.001 | 0.805 |
|   |   |   | 2.5 | 2 | 1.5 | 2 |   |   |   | 3.5 | 3 | 2.5 | 3 | 16479.711 | 0.002  | 0.742 |
|   |   |   | 2.5 | 3 | 2.5 | 2 |   |   |   | 3.5 | 4 | 3.5 | 3 | 16492.805 | -0.002 | 0.831 |
|   |   |   | 2.5 | 3 | 2.5 | 3 |   |   |   | 3.5 | 4 | 3.5 | 4 | 16492.225 | -0.003 | 1.154 |
|   |   |   | 2.5 | 3 | 3.5 | 3 |   |   |   | 3.5 | 4 | 4.5 | 4 | 16493.962 | 0.001  | 1.153 |
|   |   |   | 2.5 | 3 | 3.5 | 4 |   |   |   | 3.5 | 4 | 4.5 | 5 | 16493.261 | 0.001  | 1.513 |

---
